# Supplementary material for: NLRP3 selectively drives IL-1β secretion by Pseudomonas aeruginosa infected neutrophils and regulates corneal disease severity
Source: PubMed Central journal article supplement (PMC10511713; doi:10.1038/s41467-023-41391-7), 2023-09-20
Supplement: 41467_2023_41391_MOESM1_ESM.pdf [file 41467_2023_41391_MOESM1_ESM.pdf]

| REAGENT or RESOURCE                                                             | SOURCE         | IDENTIFIER                       |
|---------------------------------------------------------------------------------|----------------|----------------------------------|
| <b>Antibodies</b>                                                               |                |                                  |
| Goat Anti-Mouse Il-1 beta / il-1f2 Polyclonal antibody, Unconjugated            | R&D Systems    | RRID:AB_416684<br>Cat# AF-401-NA |
| Mouse anti $\beta$ -actin (C-4)                                                 | Santa Cruz     | RRID:AB_2714189<br>Cat# sc-47778 |
| Anti-DFNA5/GSDME antibody [EPR19859]                                            | Abcam          | RRID:AB_2737000<br>Cat# ab215191 |
| Anti-GSDMD antibody [EPR19828]                                                  | Abcam          | RRID:AB_2783550<br>Cat# ab209845 |
| Rabbit anti-caspase-3                                                           | Cell Signaling | RRID:AB_331439<br>Cat# 9662      |
| Goat anti-rabbit IgG, HRP-linked                                                | Cell Signaling | RRID:AB_2099233<br>Cat# 7074     |
| Horse anti-mouse IgG, HRP-linked                                                | Cell Signaling | RRID:AB_330924<br>Cat# 7076      |
| Rabbit anti-goat IgG, HRP-linked                                                | R&D Systems    | Cat# HAF017                      |
| Rabbit anti-histone H3 (citulline R2 + R8 + R17)                                | abcam          | RRID:AB_304752<br>Cat# ab5103    |
| Goat anti-Rat IgG (H+L) Cross-Adsorbed Secondary Antibody, Alexa Fluor™ 647     | Invitrogen     | RRID:AB_141778<br>Cat# A-21247   |
| Rabbit anti-Mouse IgG (H+L) Cross-Adsorbed Secondary Antibody, Alexa Fluor™ 488 | Invitrogen     | RRID:AB_2534106<br>Cat# A-11059  |
| Rabbit anti-Mouse IgG (H+L) Cross-Adsorbed Secondary Antibody, Alexa Fluor™ 555 | Invitrogen     | RRID:AB_2535848<br>Cat# A-21427  |
| Brilliant Violet 510 anti-mouse Ly-6G Antibody, clone 1A8                       | Abcam          | Cat# ab222736                    |
| AmCyan anti-mouse Ly-6G Antibody                                                |                |                                  |
| Fixable viability dye, e780                                                     | BioLegend      | Cat#503203                       |
| PE anti-mouse/human CD11b Antibody, clone M1/70                                 | BioLegend      | RRID:AB_1186099;<br>Cat#127608   |
| PE/Dazzle™ 594 anti-mouse/human CD11b Antibody                                  | BioLegend      | RRID:AB_1574975<br>Cat# 101320   |
| <b>Chemicals, peptides, and recombinant proteins</b>                            |                |                                  |
| LPS-EK ULTRAPURE (Ultrapure lipopolysaccharide from <i>E. coli</i> K12)         | InvivoGen      | Cat# tlrl-pekllps                |
| Adenosine 5' -triphosphate disodium salt hydrate (ATP)                          | Sigma Aldrich  | Ca# A6419-1G                     |
| Recombinant murine M-CSF (rmM-CSF)                                              | STEMCELL       | Cat# 78059.1                     |
| Recombinant murine GM-CSF (rmGM-CSF)                                            | STEMCELL       | Cat# 78017                       |
| Recombinant human TNF $\alpha$ (rhTNF $\alpha$ )                                | R&D Systems    | Cat# 210-TA                      |
| Birinapant (SMAC mimetic)                                                       | MedChemExpress | Cat# HY-16591/CS-1719            |
| MCC950 (NLRP3 inhibitor)                                                        | Invivogen      | inh-mcc                          |
| Diphenyleneiodonium chloride (DPI)                                              | Sigma Aldrich  | Cat# D2926                       |
| SYTOX Green                                                                     | Invitrogen     | Cat# S 7020                      |
| Phorbol myristate acetate (PMA)                                                 | Sigma Aldrich  | Cat# P1585                       |
| Z-VAD-FMK (pan-caspase inhibitor)                                               | APExBIO        | Cat# A1902                       |
| Ac-YVAD-cmk (caspase-1 inhibitor)                                               | Sigma Aldrich  | Cat# SML0429-5MG                 |
| Z-IETD-FMK (caspase 8 inhibitor)                                                | APExBIO        | Cat# B3232                       |
| Q-VD(OMe)-OPh (pan-caspase inhibitor)                                           | APExBIO        | Cat# A8165                       |

|                                                                                                       |                                                    |                                     |
|-------------------------------------------------------------------------------------------------------|----------------------------------------------------|-------------------------------------|
| Z-DEVD-FMK (caspase 3 inhibitor)                                                                      | APExBIO                                            | Cat# A1920                          |
| Necrosulfonamide (NSA)                                                                                | TOCRIS bioscience                                  | 1360614-48-7                        |
| Disulfiram (GSDMD inhibitor)                                                                          | MedChemExpress                                     | Cat# HY-B0240/CS-2209               |
| LDC7559                                                                                               | MedChemExpress                                     | HY-111674/CS-0089815                |
| Diisopropylfluorophosphate (DFP; protease inhibitor)                                                  | Sigma Aldrich                                      | Cat# D0879                          |
| Casein sodium salt from bovine milk                                                                   | Sigma Aldrich                                      | Cat# C8654-500G                     |
| Collagenase from <i>Clostridium histolyticum</i>                                                      | Sigma Aldrich                                      | CAS# 54724-00-4<br>Cat# C7821-5G    |
| Cell Lysis Buffer (10X)                                                                               | Cell Signaling                                     | Cat# 9803                           |
| Luminol                                                                                               | Sigma Aldrich                                      | Cat# 123072-5G                      |
| <b>Commercial assays</b>                                                                              |                                                    |                                     |
| EasySep™ Mouse Neutrophil Enrichment kit                                                              | STEMCELL                                           | Cat# 19762A                         |
| Mojosort Mouse Neutrophil Isolation Kit                                                               | BioLegend                                          | Cat# 480058                         |
| CytoTox 96 (LDH release assay)                                                                        | Promega                                            | G1780                               |
| DuoSet mouse IL-1b ELISA                                                                              | R&D Systems                                        | DY401-05                            |
| BD Cytofix/Cytoperm Fixation/Permeablization Kit                                                      | BD Biosciences                                     | Cat#554714<br>RRID:AB_2869008       |
| Cell line: HEK-Blue™ IL-1R Cells (HEK293 reporter cells for human and murine IL-1α & IL-1β cytokines) | InvivoGen                                          | Cat# hkb-il1r                       |
| <b>Mouse lines:</b>                                                                                   |                                                    |                                     |
| Mouse: C57BL/6J                                                                                       | The Jackson Laboratory (JAX)                       | Cat# 000664<br>RRID:IMSR_JAX:000664 |
| Mouse: <i>gsdme</i> <sup>-/-</sup>                                                                    | The Jackson Laboratory (JAX)                       | Cat# 032411<br>RRID:IMSR_JAX:032411 |
| Mouse: <i>gsdmd</i> <sup>-/-</sup>                                                                    | Dr. Russell Vance                                  |                                     |
| Mouse: <i>gsdmd</i> <sup>+/-</sup> <i>gsdme</i> <sup>-/-</sup>                                        | Bred in house                                      |                                     |
| Mouse: Caspase 1 <sup>-/-</sup>                                                                       | The Jackson Laboratory (JAX)                       | Cat# 032662<br>RRID:IMSR_JAX:032662 |
| Mouse: <i>Caspase 1/11</i> <sup>-/-</sup>                                                             | The Jackson Laboratory (JAX)                       | Cat# 016621<br>RRID:IMSR_JAX:016621 |
| Mouse: <i>elane</i> <sup>-/-</sup> ( <i>neutrophil elastase</i> )                                     | Dr. Timothy Kern, University of California, Irvine |                                     |
| <b>Software</b>                                                                                       |                                                    |                                     |
| Excel                                                                                                 | Microsoft                                          | RRID:SCR_016137                     |
| Image Lab (for use with Bio-Rad ChemiDoc)                                                             | BioRad                                             | RRID:SCR_014210                     |
| Photoshop                                                                                             | Adobe                                              | RRID:SCR_014199                     |
| Illustrator                                                                                           | Adobe                                              | RRID:SCR_010279                     |
| Biorender                                                                                             | Biorender                                          | RRID:SCR_018361                     |
| Zen blue microscope imaging                                                                           | Zeiss                                              | RRID:SCR_013672                     |
| BioTek Gen5                                                                                           | Agilent                                            | RRID:SCR_017317                     |
| GraphPad Prism                                                                                        | GraphPad                                           | RRID:SCR_002798                     |
| NovoExpress Software                                                                                  | Agilent                                            |                                     |

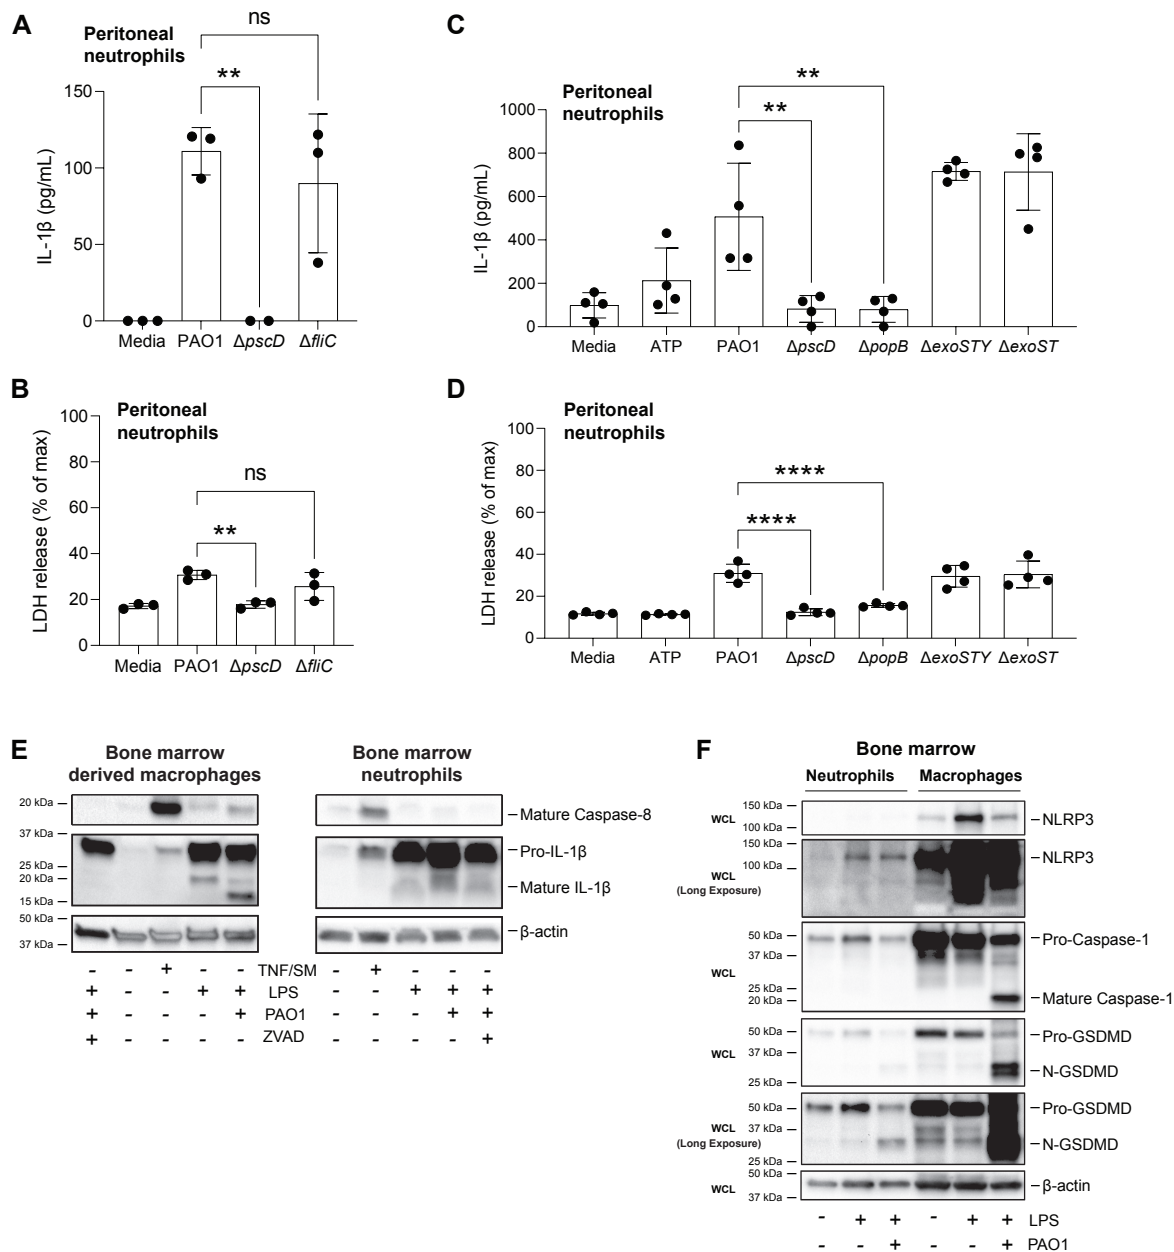

**Figure S1. IL-1 $\beta$  secretion by peritoneal neutrophils, Caspase-8 and IL-1 $\beta$  cleavage, and relative production of inflammasome proteins.**

**A-D. IL-1 $\beta$  secretion and pyroptosis in peritoneal neutrophils.** Neutrophils were isolated from the peritoneal cavity and purified by negative bead selection following intraperitoneal injection of casein to induce sterile inflammation (-24h, -3h i.p. injections). **A,C.** IL-1 $\beta$  secretion; **B,D.** LDH release. Peritoneal neutrophils were infected for 1h with PAO1 or with T3SS or flagellin ( $\Delta$ fliC) mutants. *Peritoneal neutrophils were not primed with LPS.* Data points represent biological replicates from 2-3 repeat experiments.

**E. Caspase-8 and IL-1 $\beta$  cleavage in bone marrow derived macrophages and bone marrow neutrophils.** Cells were stimulated with TNF- $\alpha$  and SMAC mimetic (TNF/SM) or LPS/PAO1 in the presence of the pan-caspase inhibitor ZVAD, and whole cell lysates with supernatants were prepared for western blot analysis for caspase-8 and IL-1 $\beta$ .

**F. Relative production of inflammasome proteins by bone marrow neutrophils and BM derived macrophages.**  $1 \times 10^6$  neutrophils and macrophages were either left unstimulated or incubated for 3h with LPS before being infected for 1h with PAO1. Whole cell lysates were processed for western blots to examine the relative production of NLRP3, caspase-1 and GSDMD.

Western blots are representative of 3 repeat experiments. Each data point represents one independent experiment (2-4 biological replicates); error bars are mean $\pm$  standard deviation (SD). **A-D:** One way ANOVA with Tukey's post-hoc analysis (Mean  $\pm$  SD). \*\*\*\* represents p < 0.0001, \*\* is < 0.01. ns: not statistically significant.

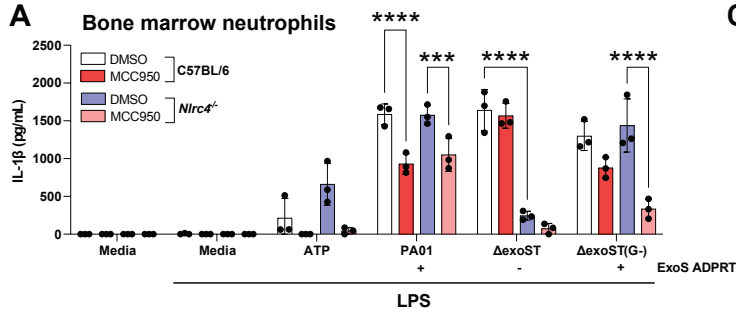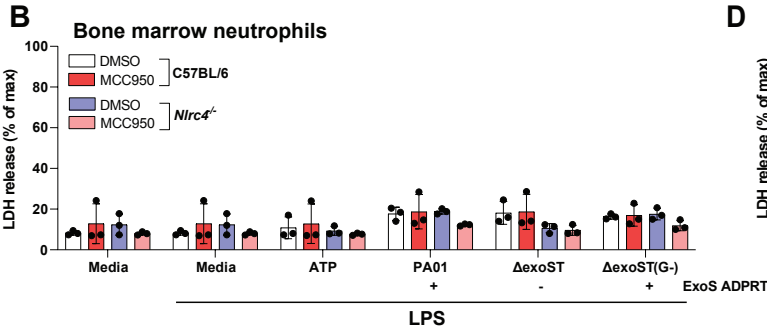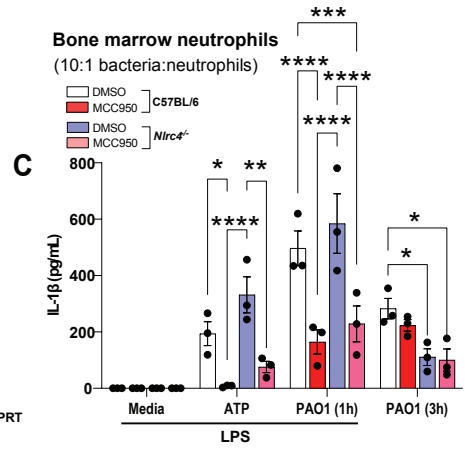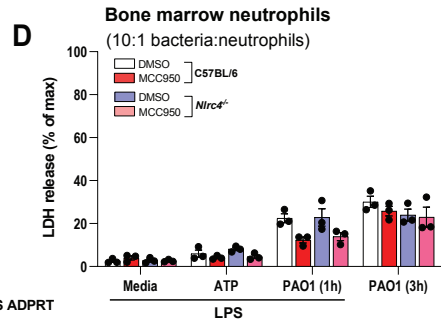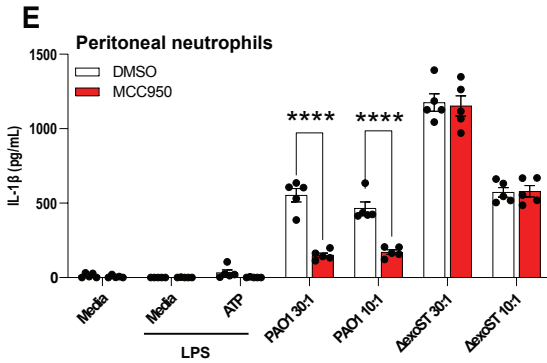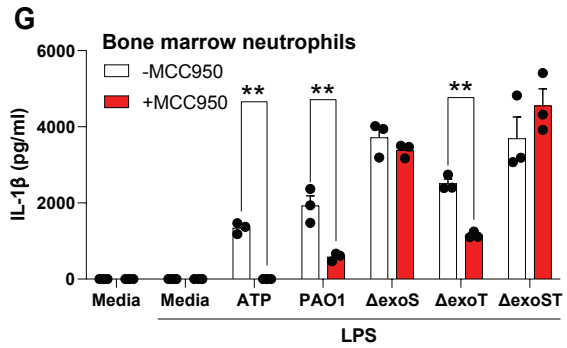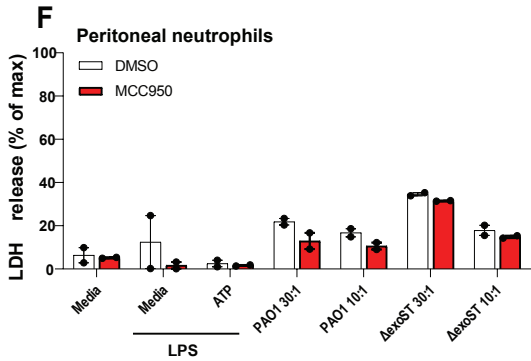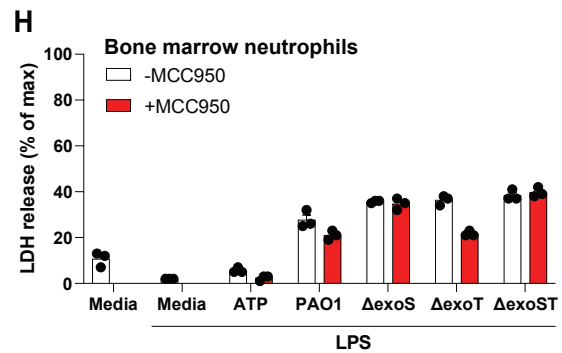

**Figure S2. MCC950 inhibition of IL-1 $\beta$  secretion by C57BL/6 and *Nlrc4*<sup>-/-</sup> bone marrow neutrophils and peritoneal neutrophils.**

**A, B.** Neutrophils isolated from C57BL/6 and *Nlrc4*<sup>-/-</sup> mice were LPS primed for 3h and infected with PAO1 or mutants for 1h in the presence of MCC950 or DMSO at a multiplicity of infection (MOI) of 30:1 (bacteria: neutrophils). IL-1 $\beta$  and LDH in culture supernatants were quantified. **C, D.** IL-1 $\beta$  and LDH in C57BL/6 and *Nlrc4*<sup>-/-</sup> mouse neutrophils that were either LPS primed and infected with PAO1 at an MOI of 10:1, or not primed and infected with PAO1 for 3h as described by Santoni *et. Al.*, *PLOS Pathogens* 2022. **E, F.** IL-1 $\beta$  and LDH release by peritoneal neutrophils from C57BL/6 mice were not LPS primed and were infected with 30:1 or 10:1 MOI for 1h in the presence of MCC950. **G, H.** IL-1 $\beta$  and LDH in bone marrow neutrophils from C57BL/6 mice primed and stimulated as in **A, B.** Two-way ANOVA with Tukey's post-hoc analysis (Mean  $\pm$  SD). Each data point represents one independent experiment (2-5 biological replicates); error bars are mean $\pm$  SEM. A-D: \*\*\*\* represents p<0.0001, \*\*\* is p<0.001; \*\* is <0.01, \* is <0.05.

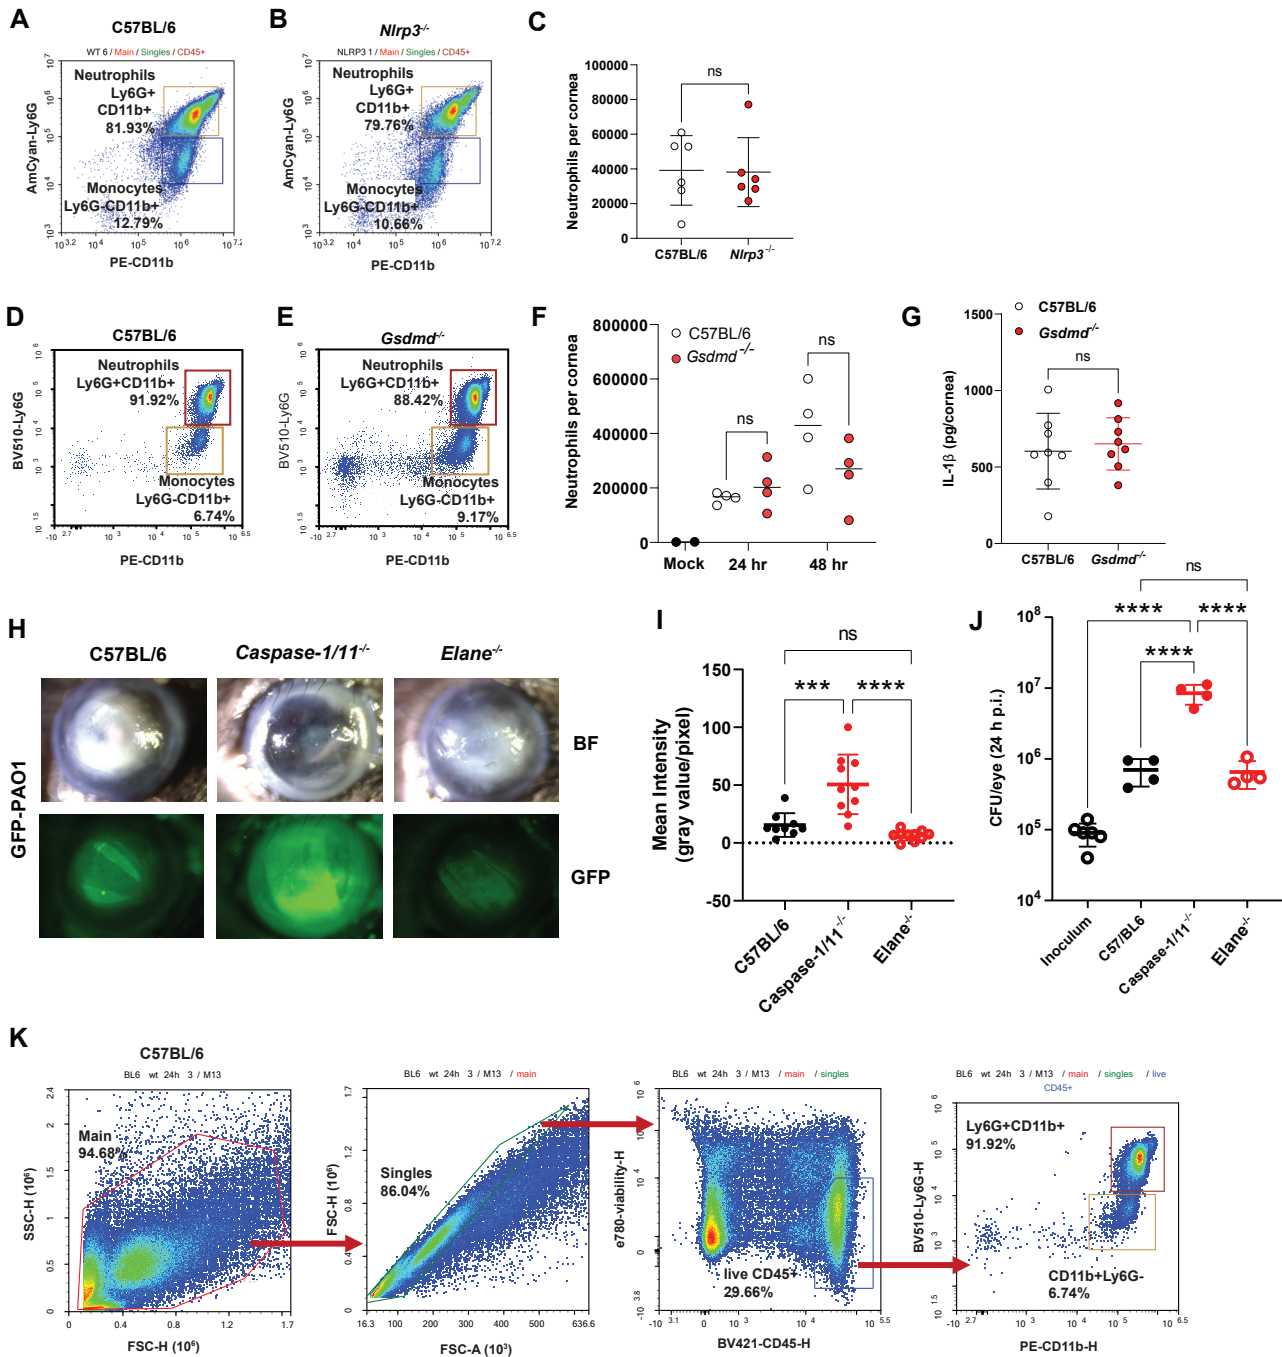

**Figure S3. Neutrophil infiltration in PAO1 infected corneas, neutrophil elastase (*Elane*)<sup>-/-</sup> mice, and gating strategy.**

**A-F. Neutrophil infiltration in PAO1 infected corneas. A-C.** Neutrophils and monocytes from C57BL/6 and *Nlrp3*<sup>-/-</sup> corneas 24h after infection with PAO1. Cells were recovered from infected corneas following collagenase digestion and processed for flow cytometry. Neutrophils were defined as CD45<sup>+</sup>, Ly6G<sup>+</sup>, CD11b<sup>+</sup>, Ly6C<sup>-</sup>; monocytes were defined as CD45<sup>+</sup>, Ly6G<sup>-</sup>, CD11b<sup>+</sup>, Ly6C<sup>+</sup>. **D-G.** Flow cytometry of neutrophils and monocytes from C57BL/6 and *Gsdmd*<sup>-/-</sup> corneas 24h post-infection with PAO1. **A,B, D,E.** representative flow cytometry scatter plots; **C,F.** quantification of total neutrophils.

**G. IL-1 $\beta$  in homogenates from infected corneas measured by ELISA.**

**H-J. Corneal infection in Caspase-1/11 and neutrophil elastase (*Elane*) gene knockout mice. H.** Representative images of corneas of C57BL/6, *caspase-1,11*<sup>-/-</sup>, and *Elane*<sup>-/-</sup> mice infected with PAO1 expressing green fluorescent protein (GFP). GFP expression (**I**) and CFU (**J**) showing significant difference between C57BL/6 and *caspase-1,11*<sup>-/-</sup>, but not between C57BL/6 and *Elane*<sup>-/-</sup> mice. Data points are biological replicates. Genotyping confirmed that these were *Elane*<sup>-/-</sup> mice (not shown).

**K.** Gating strategy for A-F. Side scatter (SSC) and forward scatter (FSC) of collagenase digested, PAO1 infected C57BL/6 corneas. Gated for singlets and live CD45<sup>+</sup> cells, which were stained for Ly6G<sup>+</sup> CD11b<sup>+</sup> neutrophils.

For all graphs, each data point represents one independent experiment (2-5 biological replicates). **C, G:** Student's 2-tailed t-tests. **F, I,J.** One-way ANOVA with Tukey's post-hoc analysis. Error bars are mean $\pm$  SD. \*\*\*\* represents p<0.0001, \*\*\* is p<0.001; \*\* is <0.01, \* is <0.05. ns: not statistically significant.

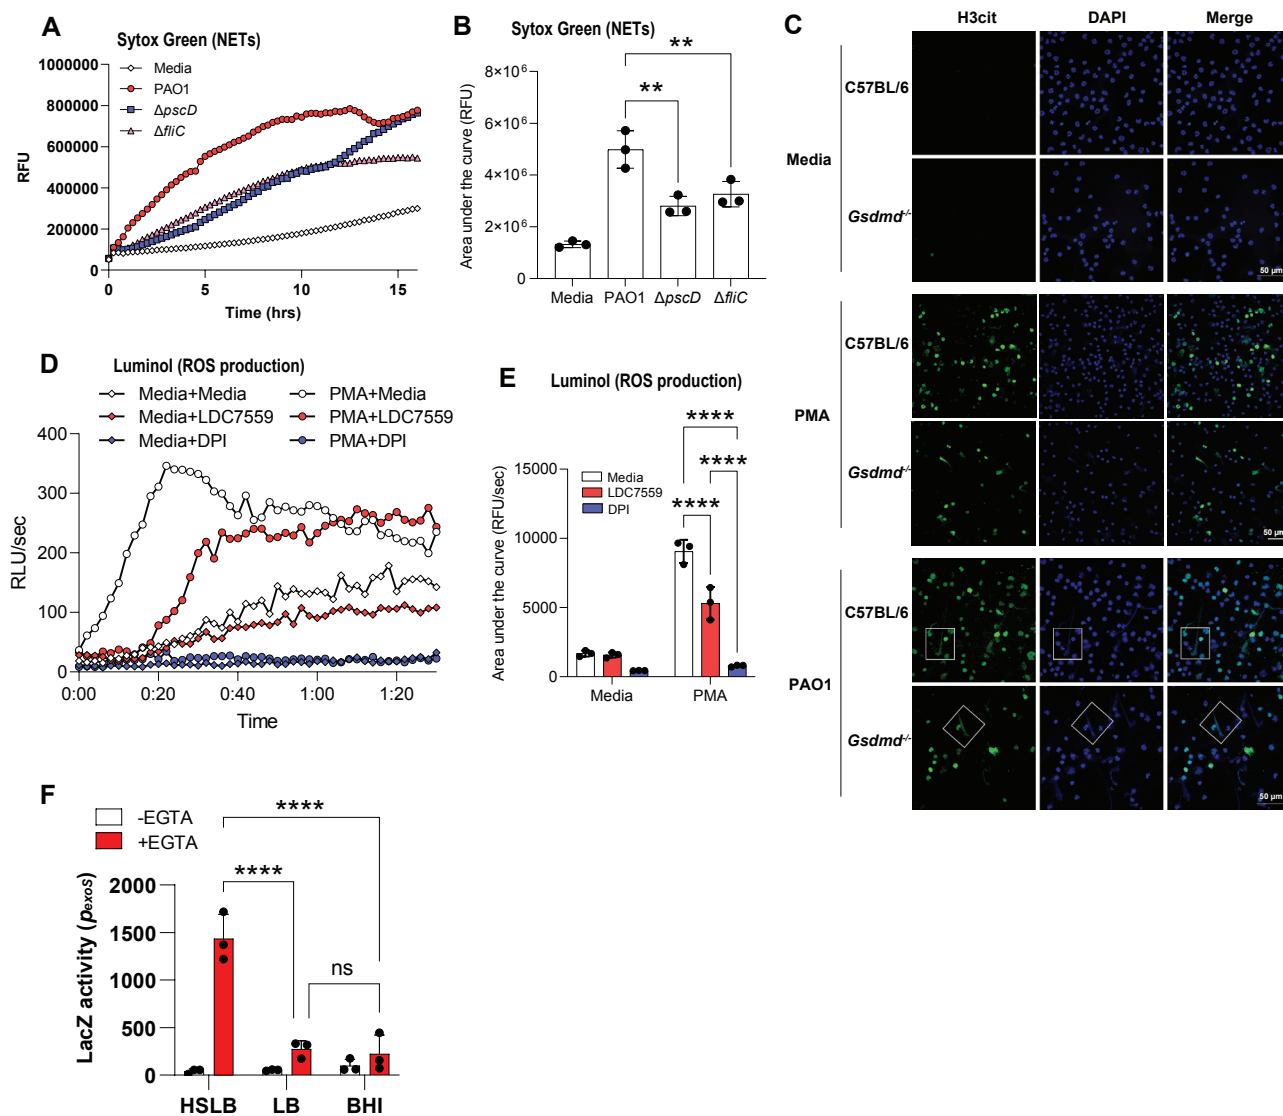

**Figure S4. Neutrophil extracellular trap formation induced by  $\DeltapscD$  and  $\DeltafliC$  mutants, LDC7559 inhibition of ROS, and ExoS expression in HSLB media.**

**A, B.** Representative time course and combined data of NETosis induced by PAO1 compared with  $\DeltapscD$  and  $\DeltafliC$  mutants (measured by Sytox<sup>TM</sup> green release over 16h). **C.** Representative images of H3Cit in PMA and PAO1 infected peritoneal neutrophils. **D,E.** Inhibition of ROS production by PMA-stimulated neutrophils incubated with DPI or LDC7559, which is consistent with data from Dixit *et al. Cell, 2021*. Representative time course (**D**) and combined biological replicates (**E**). **F.** Induction of *P. aeruginosa* T3SS gene expression was monitored using a *lacZ* reporter gene inserted at the *exoS* locus on the chromosome (strain RP1868, PAO1F  $\Delta$ *exoS*:GFP-*lacZ*). Bacteria were grown in the indicated medium: high salt LB (HSLB), standard LB with 5g/L NaCl, or brain heart infusion (BHI) broth. Secretion (and T3SS gene expression) were up-regulated by adding EGTA to chelate Ca<sup>2+</sup>, and LacZ activity was assayed as previously described. For all graphs, each data point represents one independent experiment (3 biological replicates). **B:** One-way ANOVA with Tukey's post-hoc analysis. **E,F:** 2-way ANOVA with Tukey's post-hoc analysis. Error bars are mean $\pm$  SD. \*\*\*\* represents  $p < 0.0001$ ; \*\* is  $< 0.01$ ; ns: not statistically significant.



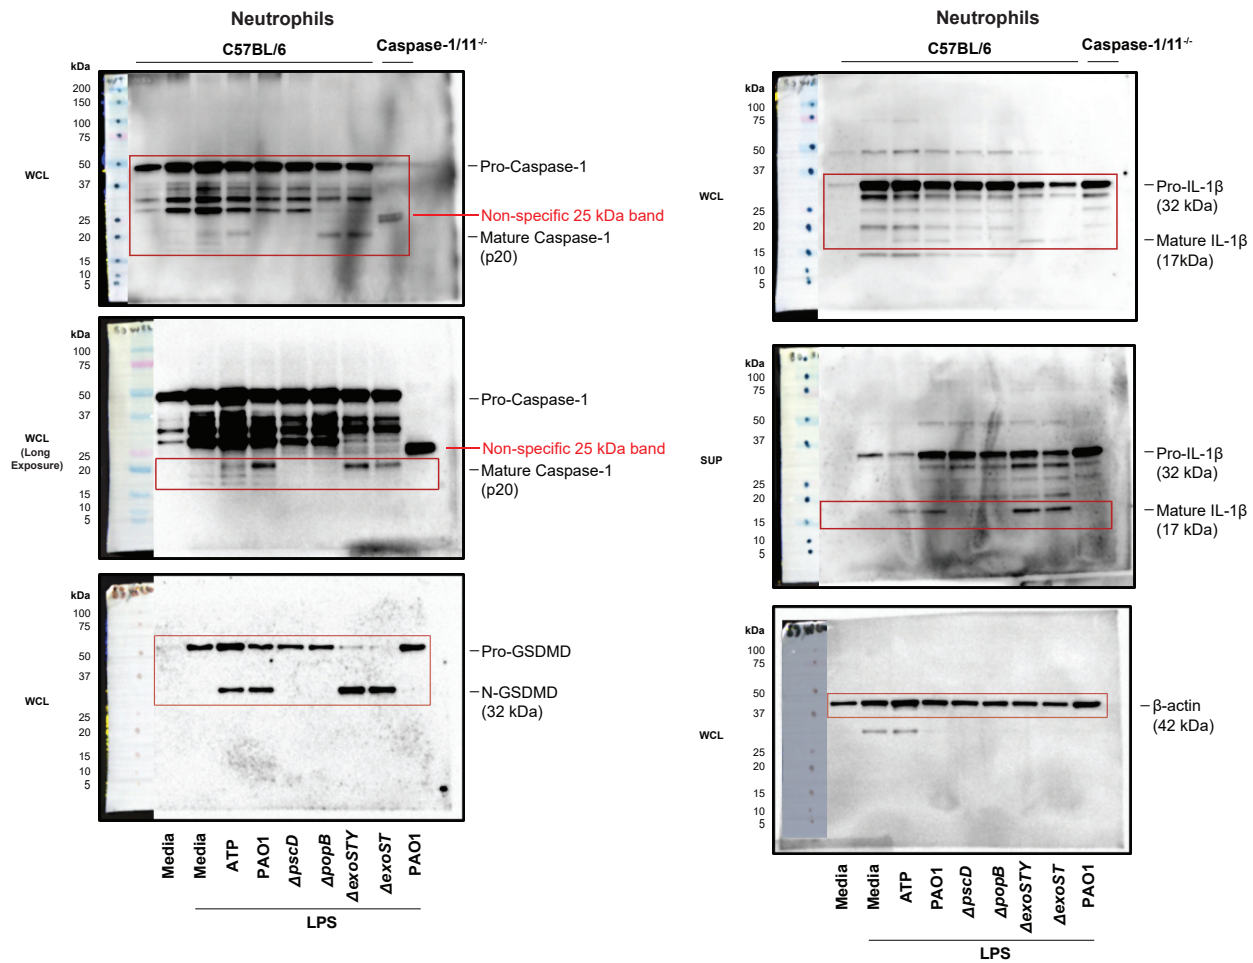

**Figure S5. Un-cropped western blot images for Figure 1D.**  
Red boxes indicate where each image was cropped for the final figures.

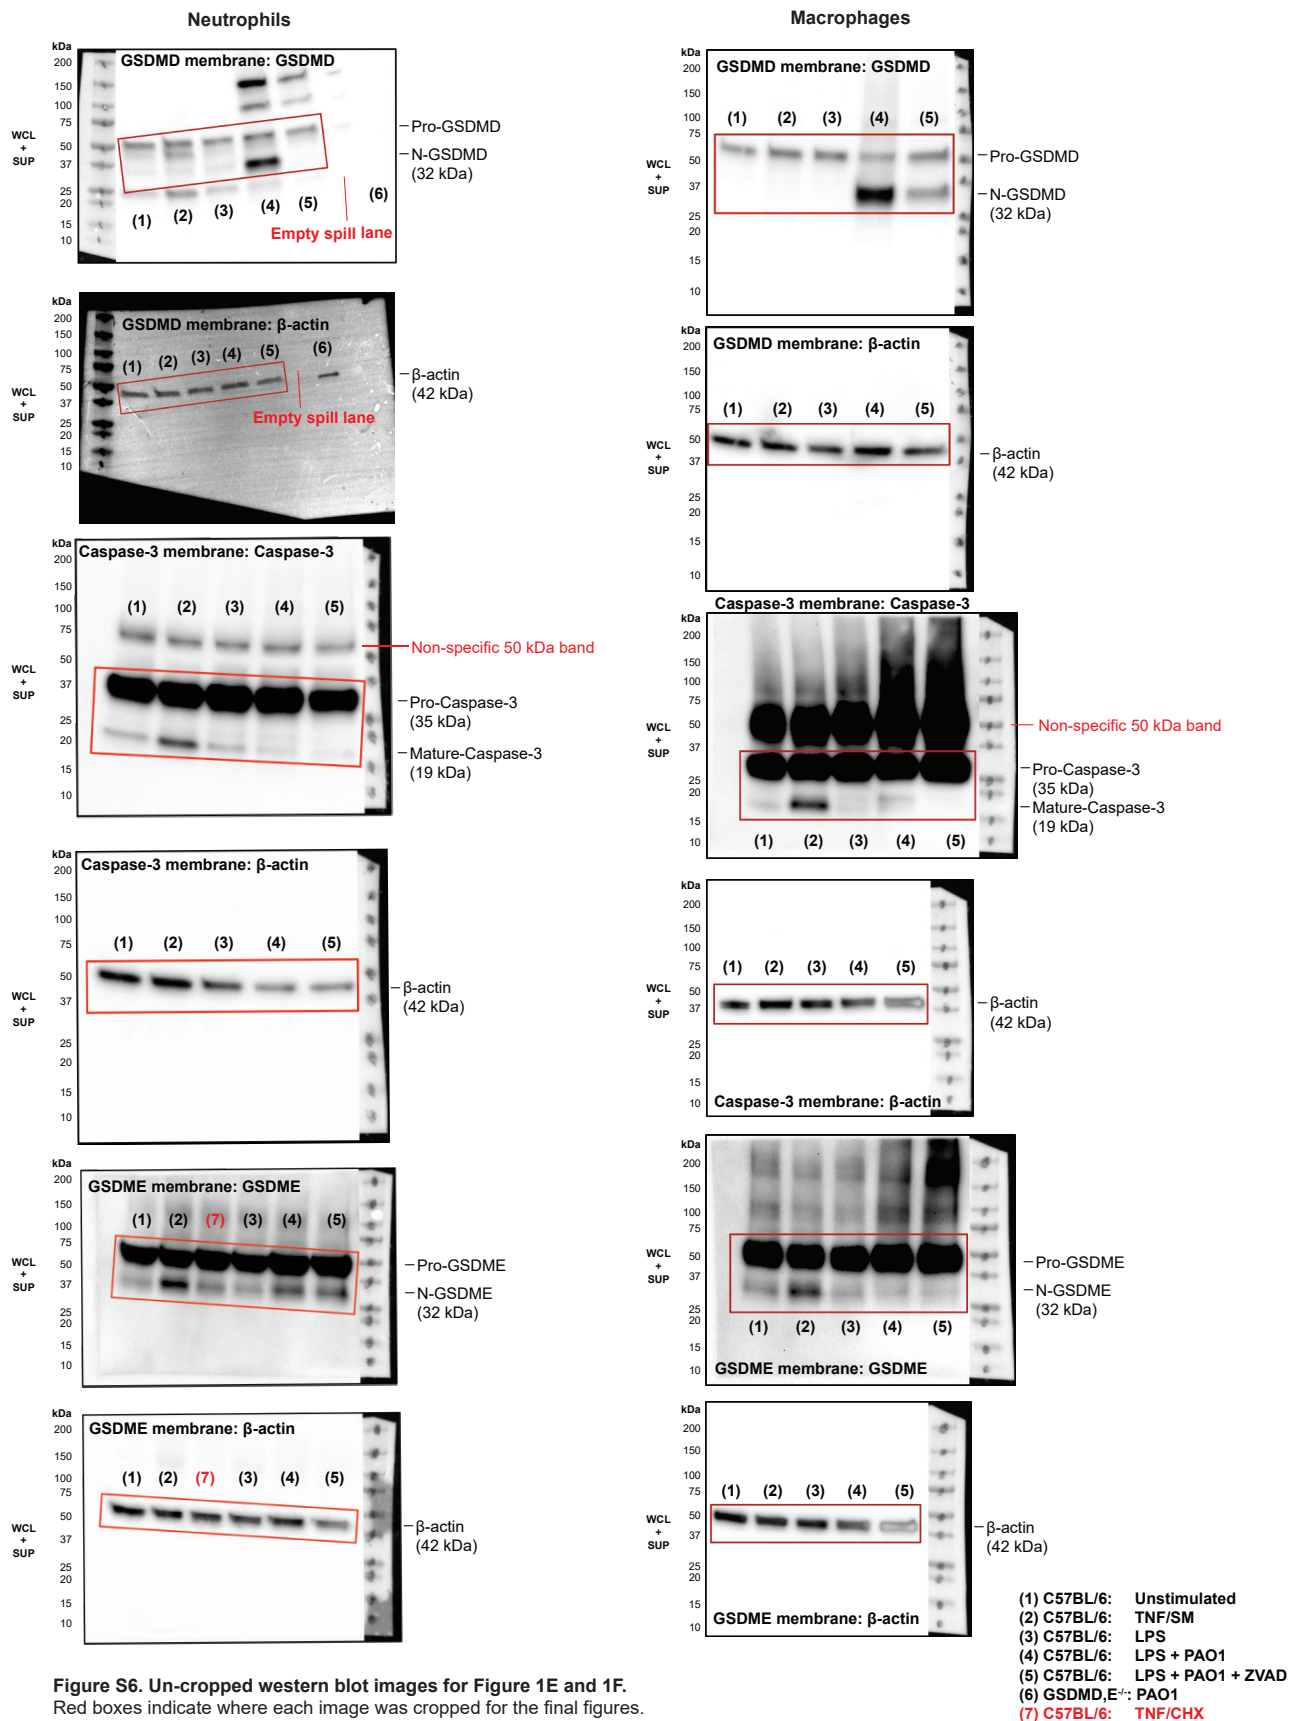

Figure S6. Un-cropped western blot images for Figure 1E and 1F. Red boxes indicate where each image was cropped for the final figures.



**Figure 3E: Macrophages**

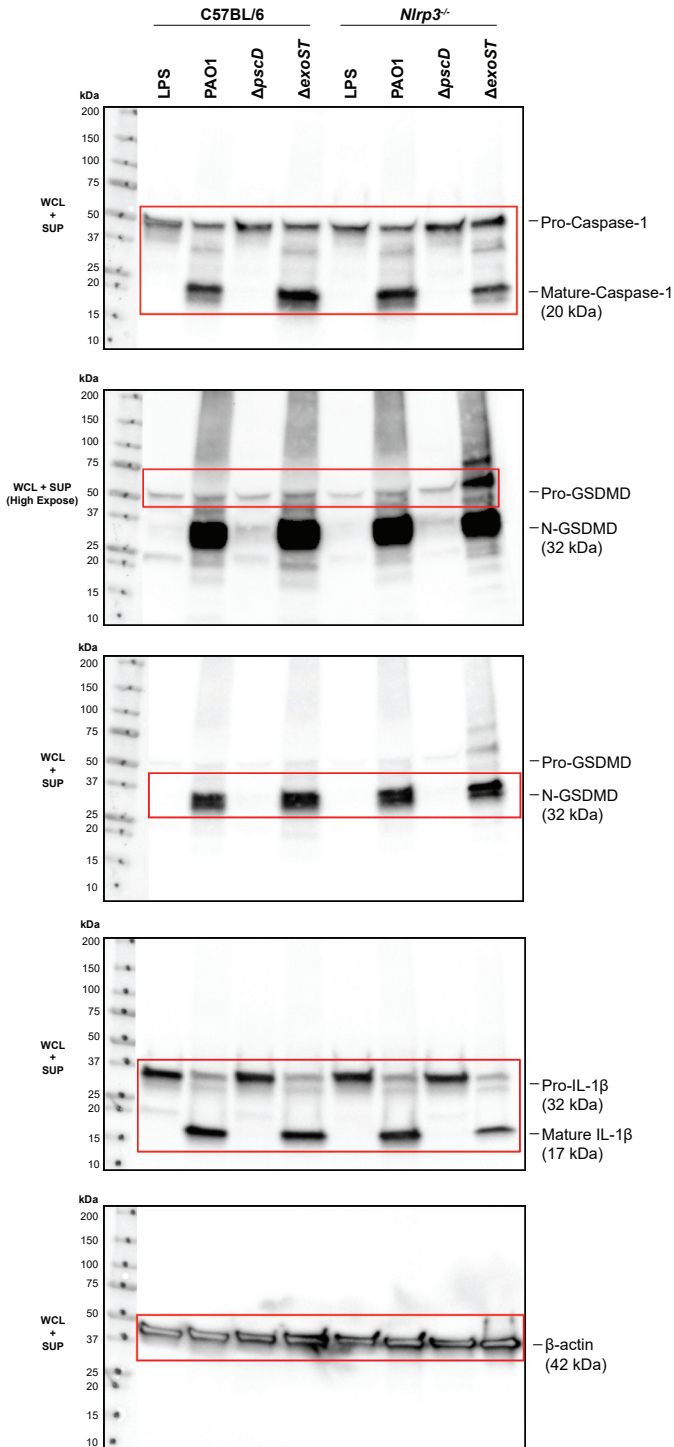

**Figure 3E: Neutrophils**

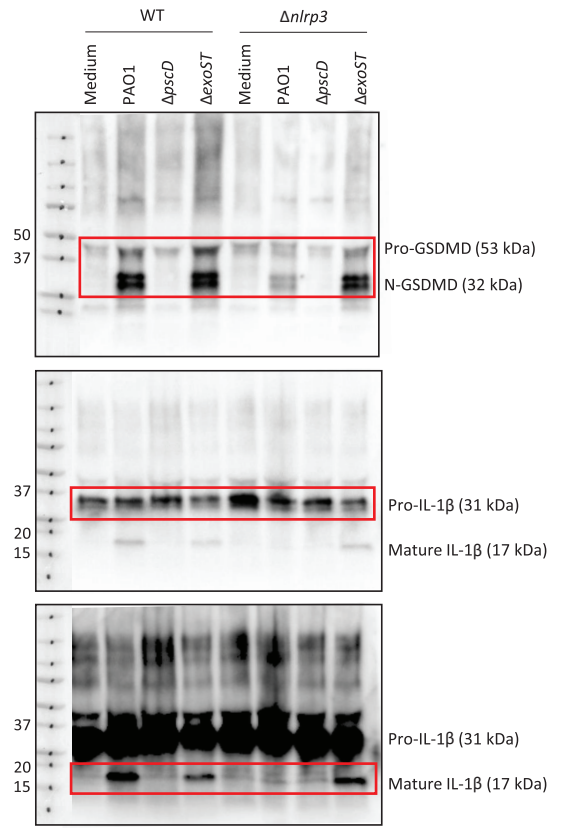

**Figure 3F: Neutrophils**

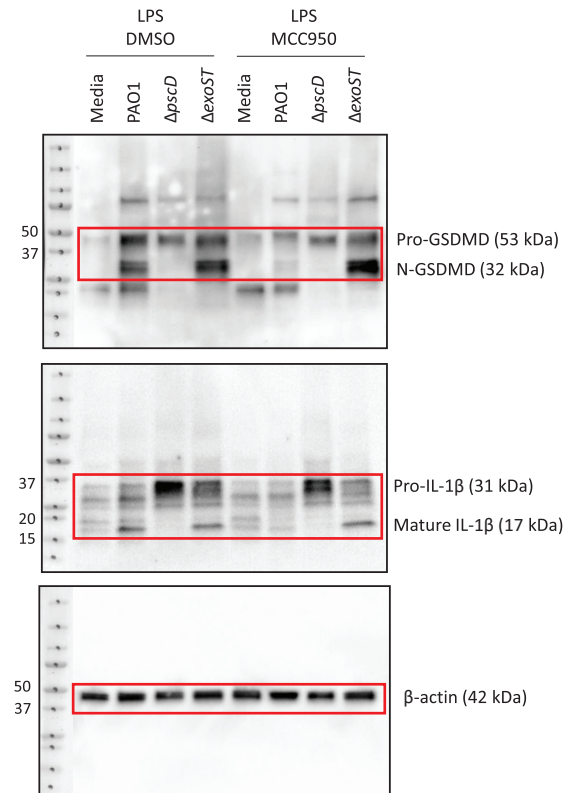

**Figure S8. Un-cropped western blot images for Figure 3E and 3F. Red boxes indicate where each image was cropped for the final figures.**



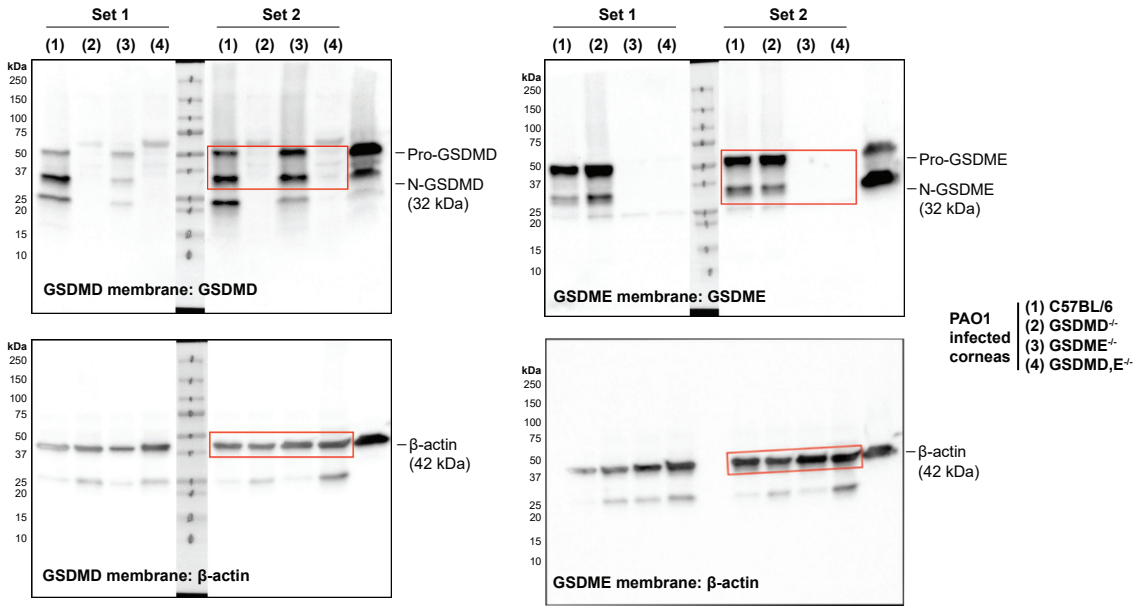

**Figure S9. Un-cropped western blot images for Figure 4H.**

Red boxes indicate where each image was cropped for the final figures. Set 1 and Set 2 are corneas from two different groups of mice.

Supplemental Figure 1E

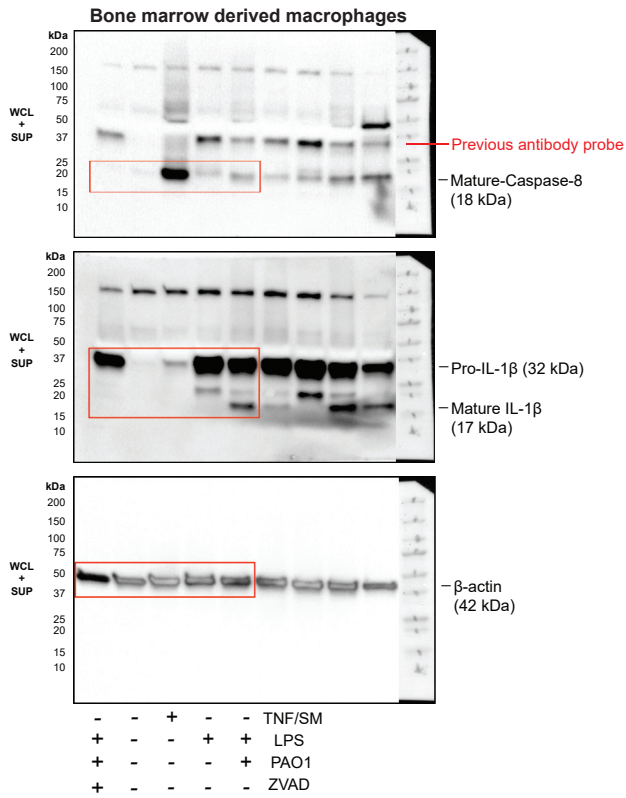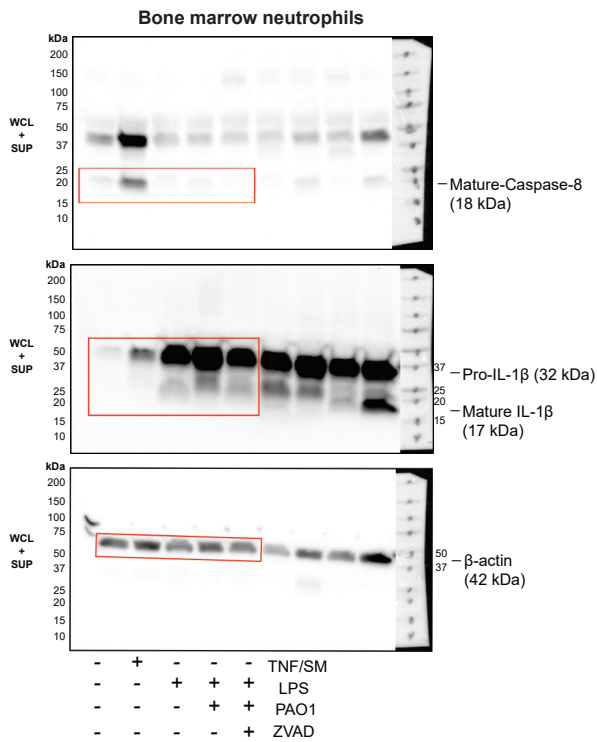

Supplemental Figure 1F

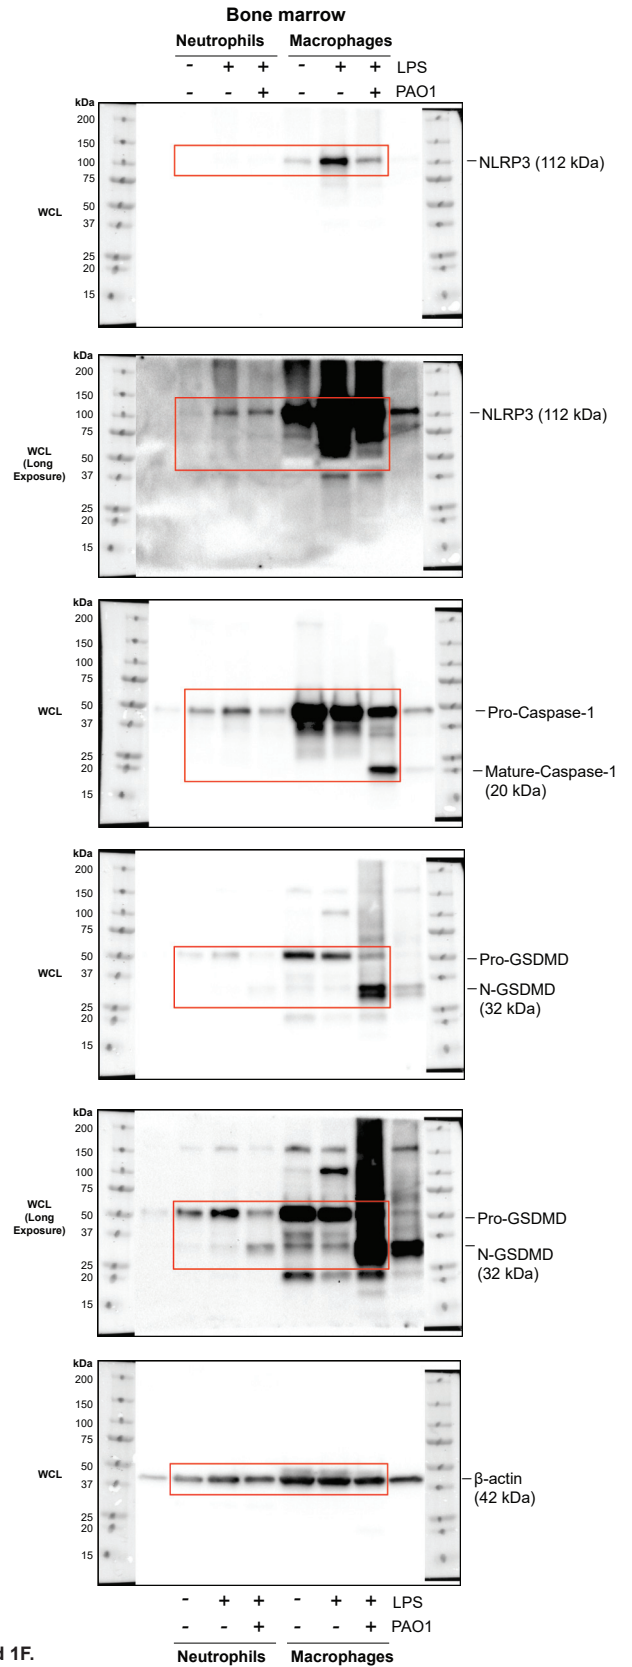

Figure S10. Un-cropped western blot images for Supplemental Figure 1E and 1F. Red boxes indicate where each image was cropped for the final figures.
